# Supplementary material for: Pressure-shortened delayed fluorescence lifetime of solid-state thermally activated delayed fluorescent 4CzIPN: the structure evolution
Source: Royal Society of Chemistry journal article supplement (doi:10.1039/d3cp01686b), 2023-01-01
Supplement: d3cp01686b1.pdf [file d3cp01686b1.pdf]

## Supporting information

### Pressure-Shortened Delayed Fluorescence Lifetime of Solid-state Thermally Activated Delayed Fluorescent 4CzIPN: the Structure Evolution

Yarong Gu,<sup>\*a</sup> Xuening Sun,<sup>b</sup> Min Wu<sup>c</sup> and Kai Wang<sup>b,c</sup>

---

*a. Department of Electronics, Xinzhou Normal University, Xinzhou, 034000, People's Republic of China. E-mail: guyr1990@163.com.*

*b. State Key Laboratory of Superhard Materials, Jilin University, Changchun, 130012, People's Republic of China.*

*c. Shandong Key Laboratory of Optical Communication Science and Technology, School of Physics Science and Information Technology, Liaocheng University, Liaocheng 252000, People's Republic of China.*

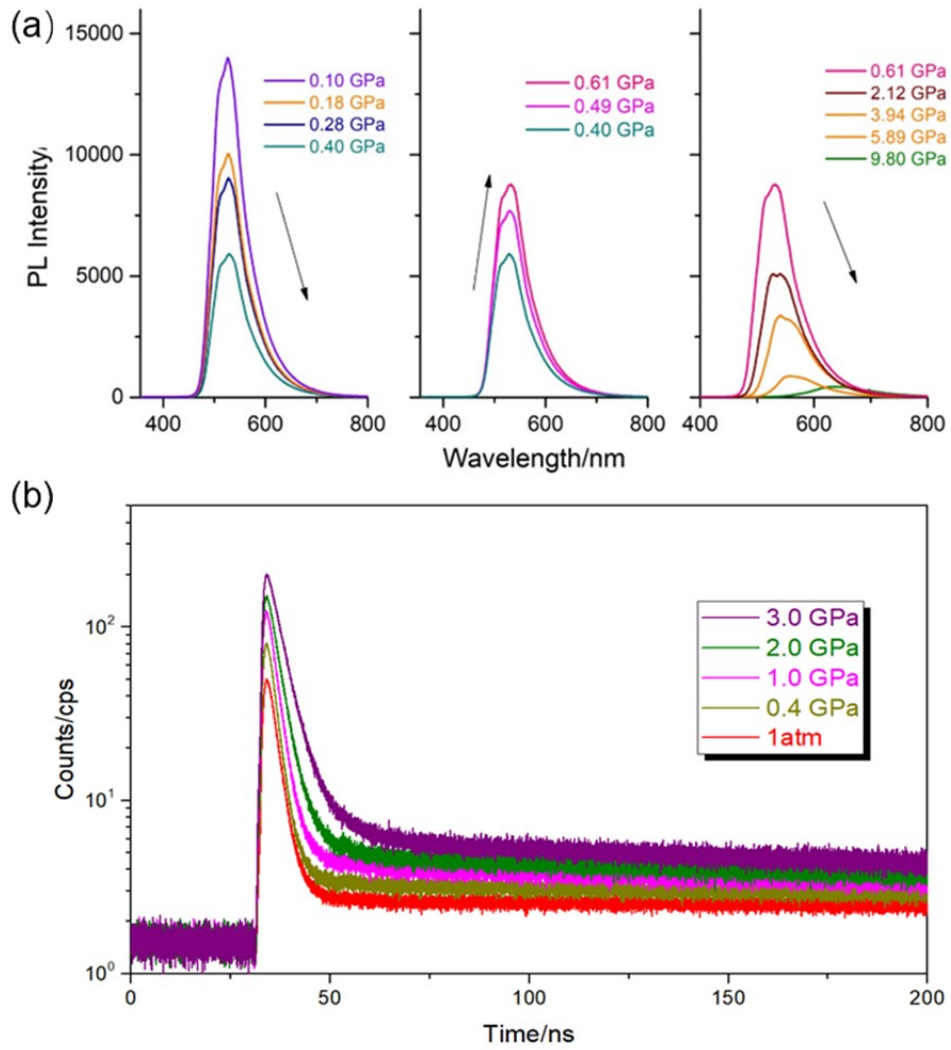

Fig. S1 (a) The PL spectra of 4CzIPN in the range of pressures from 0.1 to 9.8 GPa. (b) The change of prompt fluorescence lifetime with increasing pressure.

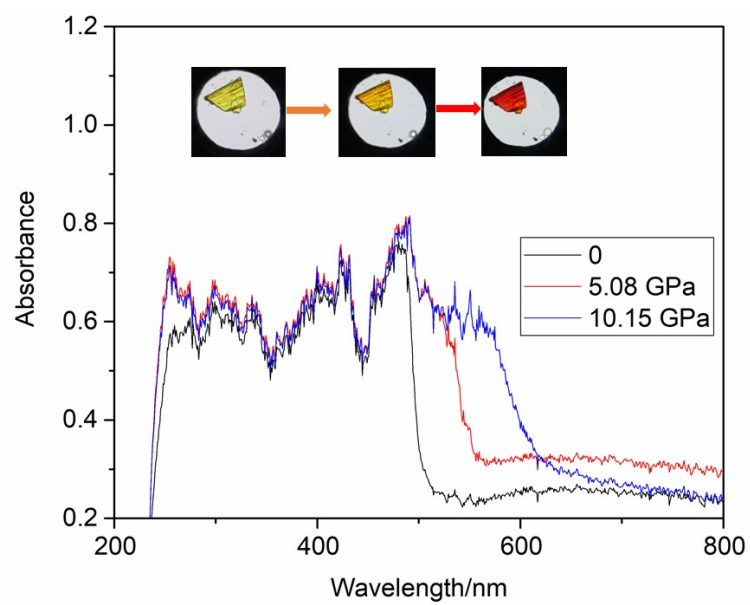

Fig. S2 the UV-vis absorption spectrum of 4CzIPN under high pressure.

Table S 1 The FWHM of the emission bands under different pressure.

| Pressure/GP    | 0.1   | 1.1   | 2.1   | 3.1   | 4.3   | 5.3   | 6.9   | 8.7    | 9.8    |
|----------------|-------|-------|-------|-------|-------|-------|-------|--------|--------|
| a              |       |       |       |       |       |       |       |        |        |
| <b>FWHM/nm</b> | 70.20 | 77.09 | 78.15 | 79.79 | 80.23 | 84.40 | 96.17 | 112.22 | 119.36 |

Table S 2 The short PL lifetime under different pressure.

| Pressure/GP        | 0.1  | 1.0  | 2.0  | 3.0  | 4.0  | 5.0  | 6.0   | 7.0   | 8.0  | 9.0  | 10.0 |
|--------------------|------|------|------|------|------|------|-------|-------|------|------|------|
| a                  |      |      |      |      |      |      |       |       |      |      |      |
| <b>Lifetime/ns</b> | 2.75 | 2.76 | 3.13 | 4.02 | 4.94 | 6.23 | 11.76 | 10.42 | 8.97 | 6.22 | 2.69 |

Table S 3 The long PL lifetime under different pressure.

| Pressure/GPa                      | 0.1  | 0.4  | 1.0  | 1.5  | 2.0 |
|-----------------------------------|------|------|------|------|-----|
| <b>Lifetime/<math>\mu</math>s</b> | 1.04 | 0.65 | 0.47 | 0.43 | 0.4 |

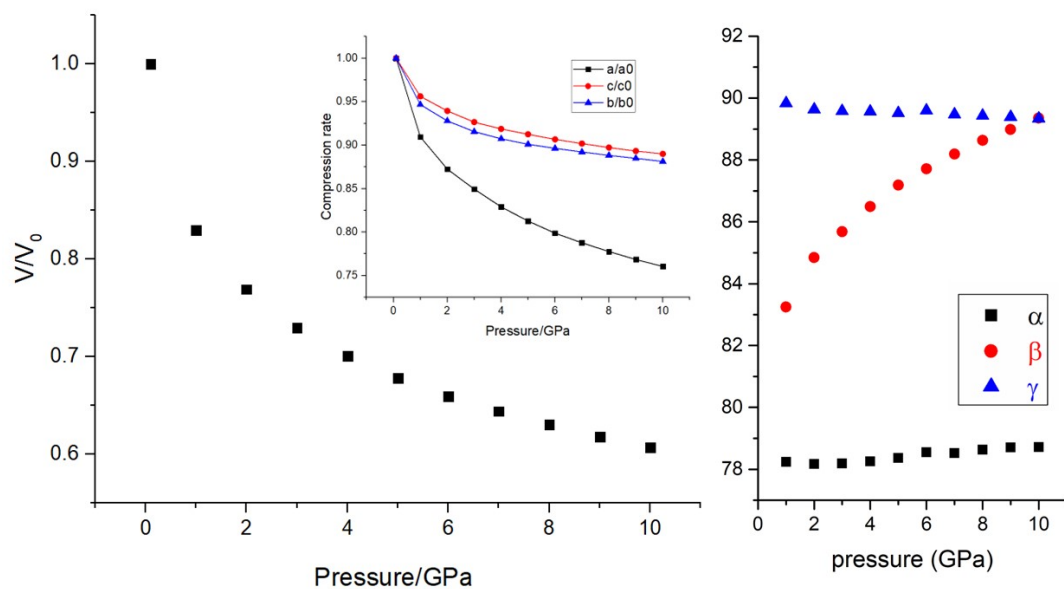

Fig. S3 (a) Compression of the unit cell volume of 4CzIPN with respect to pressure. The inset shows the compression rate of lattice constants under different pressure. (b) the change of angle  $\alpha$ ,  $\beta$ ,  $\gamma$  with pressure.

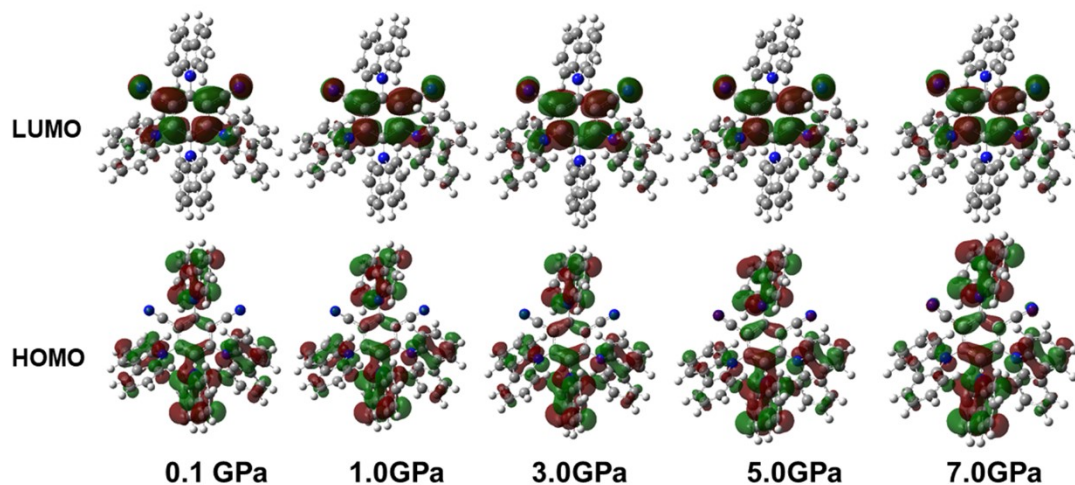

Fig. S4 The HOMO and LUMO of 4CzIPN molecule under different pressure.

Table S 4 The energy level of S<sub>1</sub> and T<sub>1</sub>, Singlet-Triplet Energy Difference ( $\Delta E_{ST}$ ) under different pressure

| Pressure/GP     | 0.1   | 1.0   | 2.0   | 3.0   | 4.0   | 5.0   | 6.0   | 7.0   |
|-----------------|-------|-------|-------|-------|-------|-------|-------|-------|
| <b>a</b>        |       |       |       |       |       |       |       |       |
| <b>S1/eV</b>    | 2.520 | 2.578 | 2.613 | 2.633 | 2.656 | 2.675 | 2.697 | 2.711 |
| <b>T1/eV</b>    | 2.361 | 2.397 | 2.419 | 2.430 | 2.444 | 2.458 | 2.473 | 2.481 |
| $\Delta E_{ST}$ | 0.159 | 0.181 | 0.194 | 0.203 | 0.212 | 0.217 | 0.224 | 0.230 |

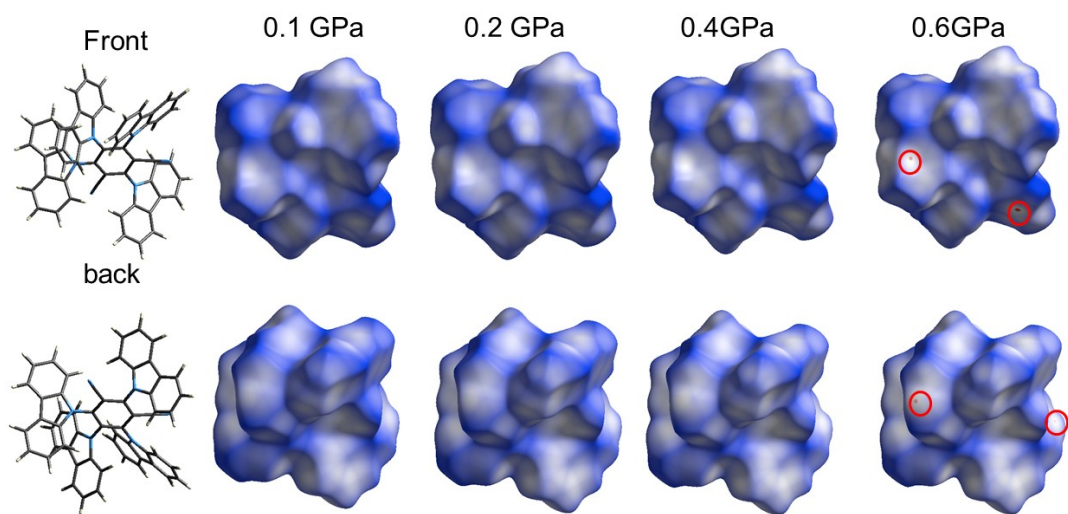

Fig. S5 Hirshfeld Surface for the Calculated Structure at 0.1, 0.2, 0.4, and 0.6GPa Mapped with a  $d_{norm}$  Distance.



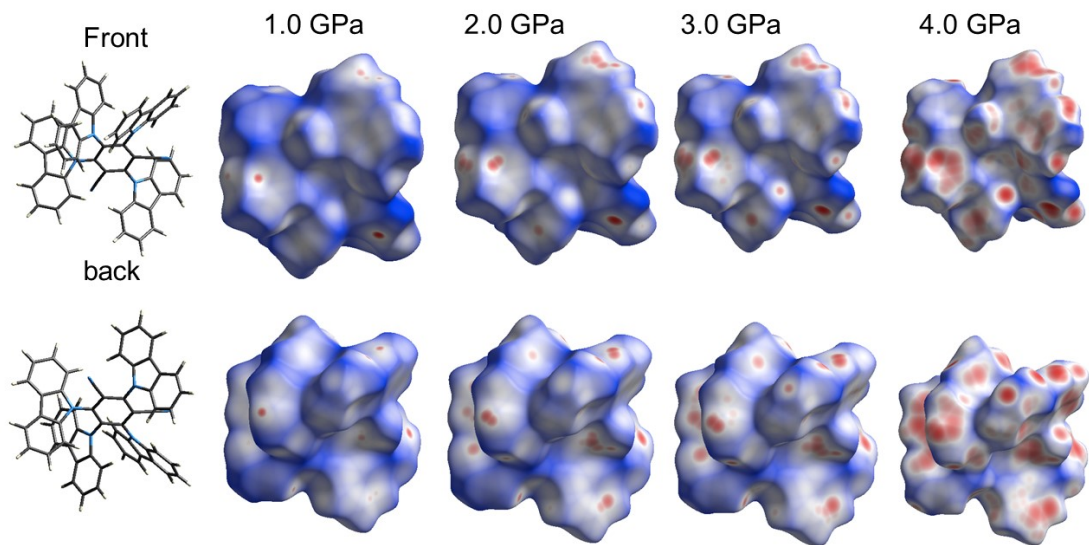

Fig. S6 Hirshfeld Surface for the Calculated Structure at 1.0, 2.0, 3.0, and 4.0 GPa Mapped with a  $d_{norm}$  Distance.

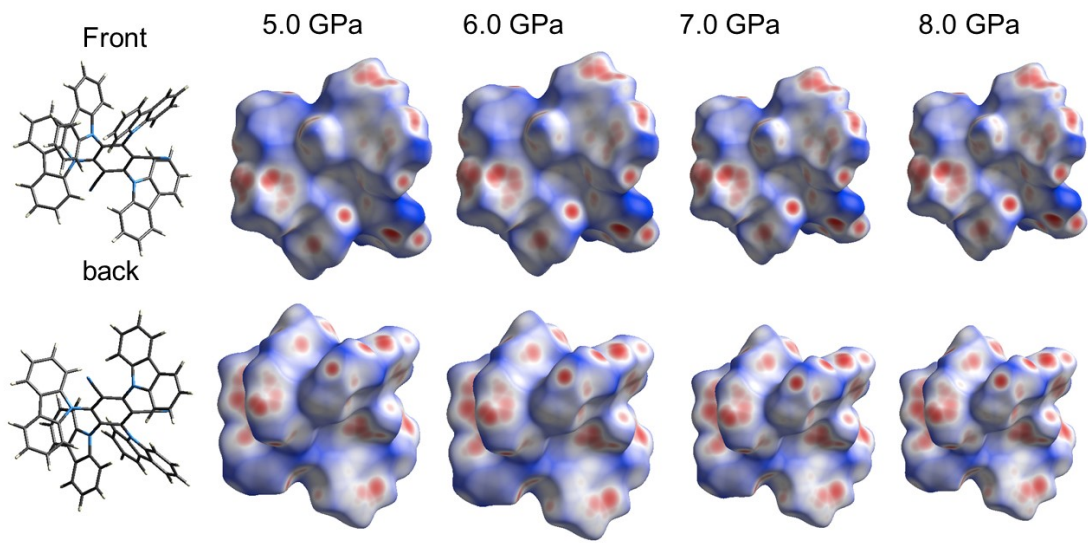

Fig. S7 Hirshfeld Surface for the Calculated Structure at 5.0, 6.0, 7.0, and 8.0 GPa Mapped with a  $d_{norm}$  Distance

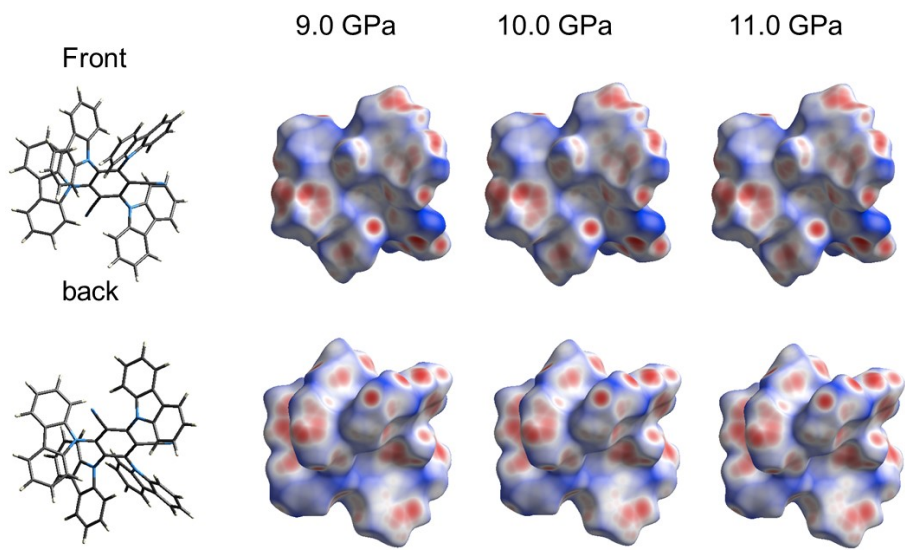

Fig. S8 Hirshfeld Surface for the Calculated Structure at 9.0, 10.0 and 11.0 GPa Mapped with a  $d_{norm}$  Distance

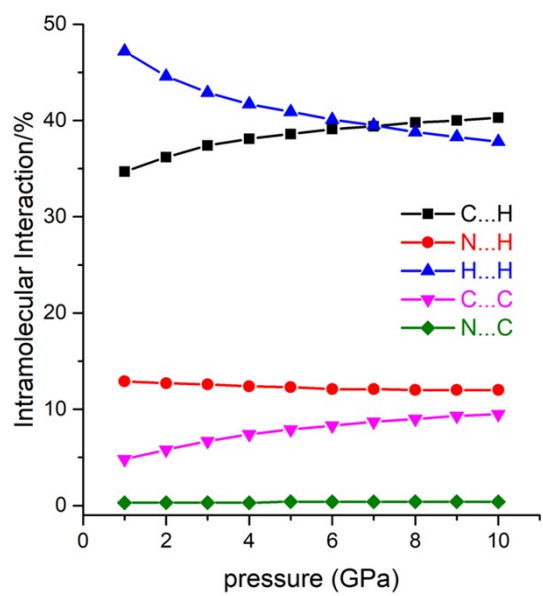

Fig. S9 Contribution rate of different interactions to the Hirshfeld surface area versus pressure.
